# Supplementary material
Source: PubMed Central journal article supplement (PMC7086031)
Supplement: supp_RA119.011227_156083_1_supp_438790_q21t3t.pdf [file supp_RA119.011227_156083_1_supp_438790_q21t3t.pdf]

## **SUPPORTING INFORMATION**

### **The regulatory protein 14-3-3 $\beta$ binds to the IQ motifs of myosin-1C independently of phosphorylation**

Huan-Hong Ji and E. Michael Ostap

From the Pennsylvania Muscle Institute, Department of Physiology, and Center for Engineering  
Mechanobiology, Perelman School of Medicine at the University of Pennsylvania, Philadelphia, PA  
19104

#### Two Supporting Figures:

Figure S1: Phosphorylation of Myo1c with CaMKII

Figure S2: Comparison of sequence and structure of Myo1c IQ motifs and  $\alpha$ 2 helix of ChREBP

#### Excel File Containing Mass Spectra Data

**A**

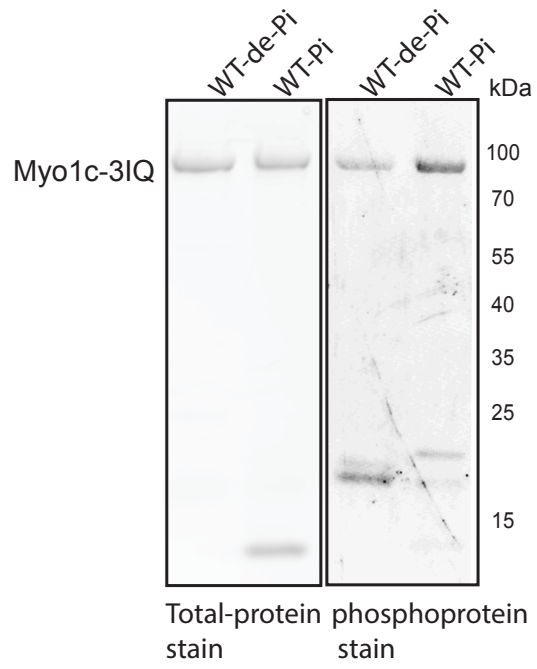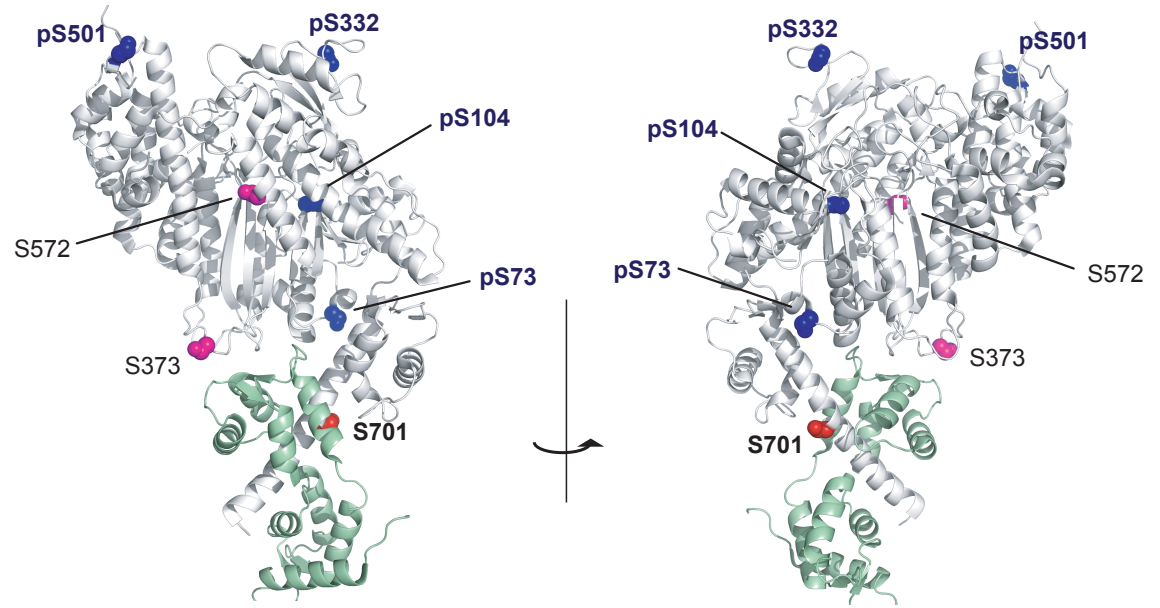

**B****71-GVpSFYEVPPHLFAVADTVYR-90**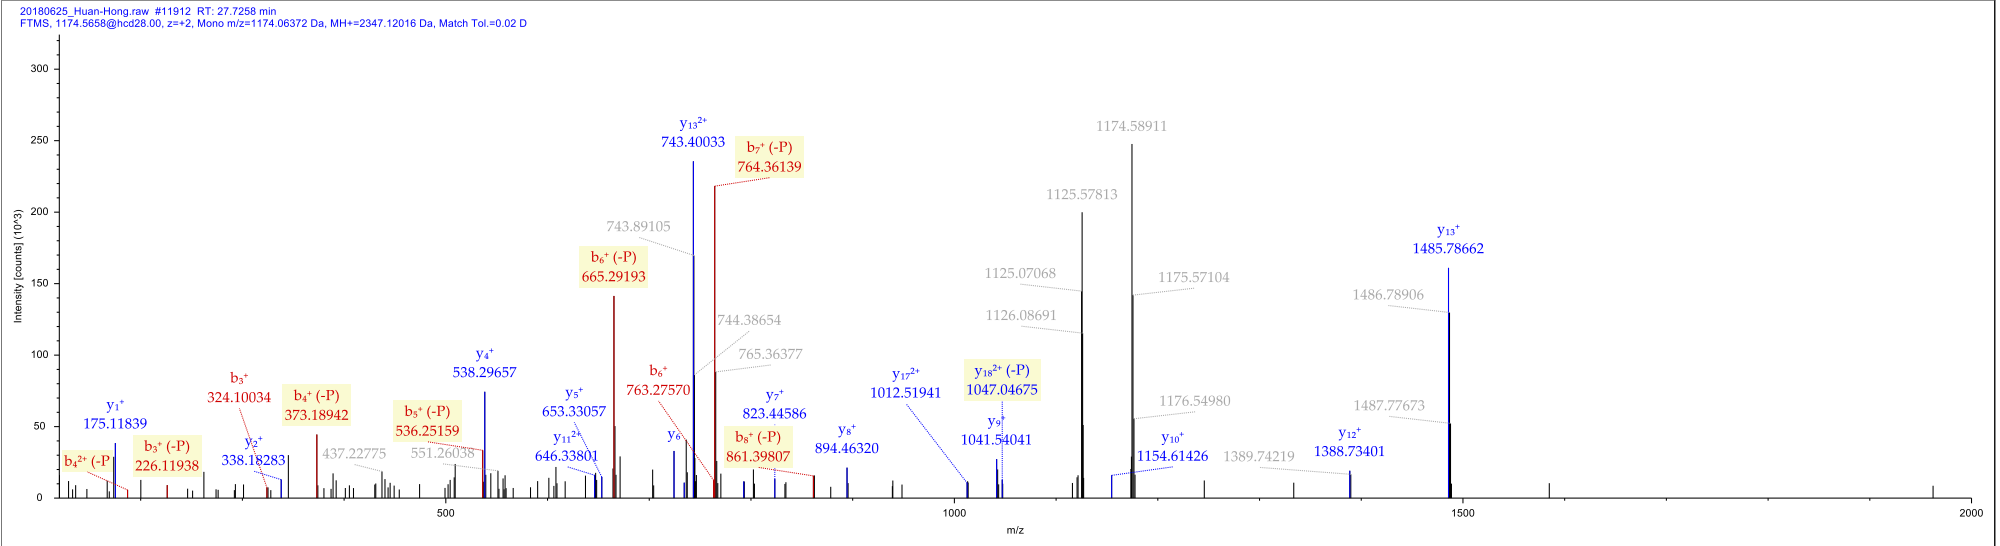**98-DQAVMipSGESGAGK-111**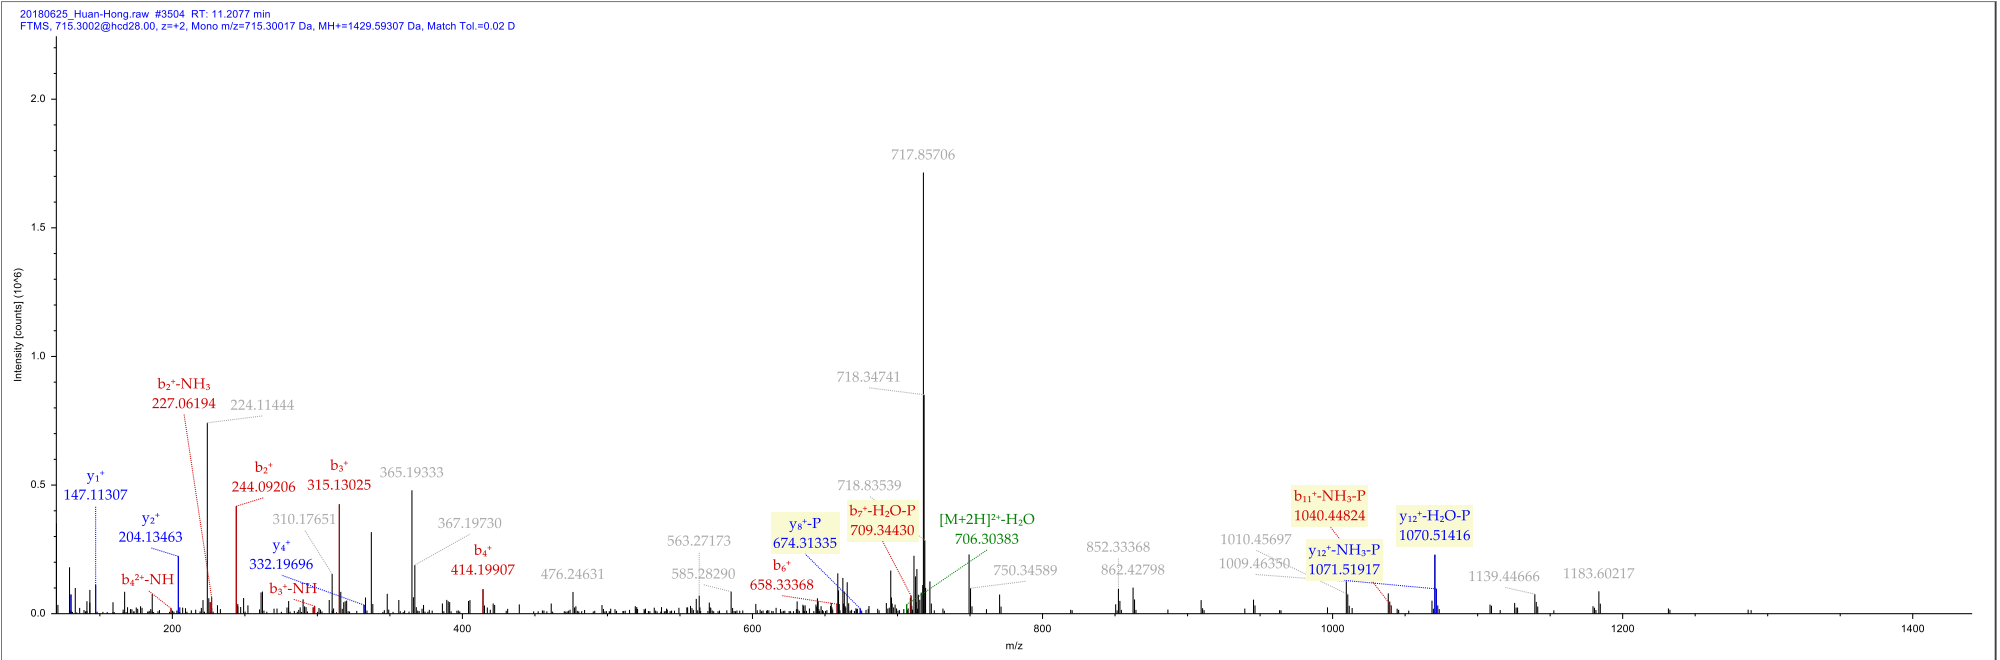

### 327-GEELLpSPLNLEQAAYAR-343

20180625\_Huan-Hong.raw #10831 RT: 25.9492 min  
 FTMS, 977.9702@hcd28.00, z=+2, Mono m/z=977.47156 Da, MH+=1953.93584 Da, Match Tol.=0.02 D

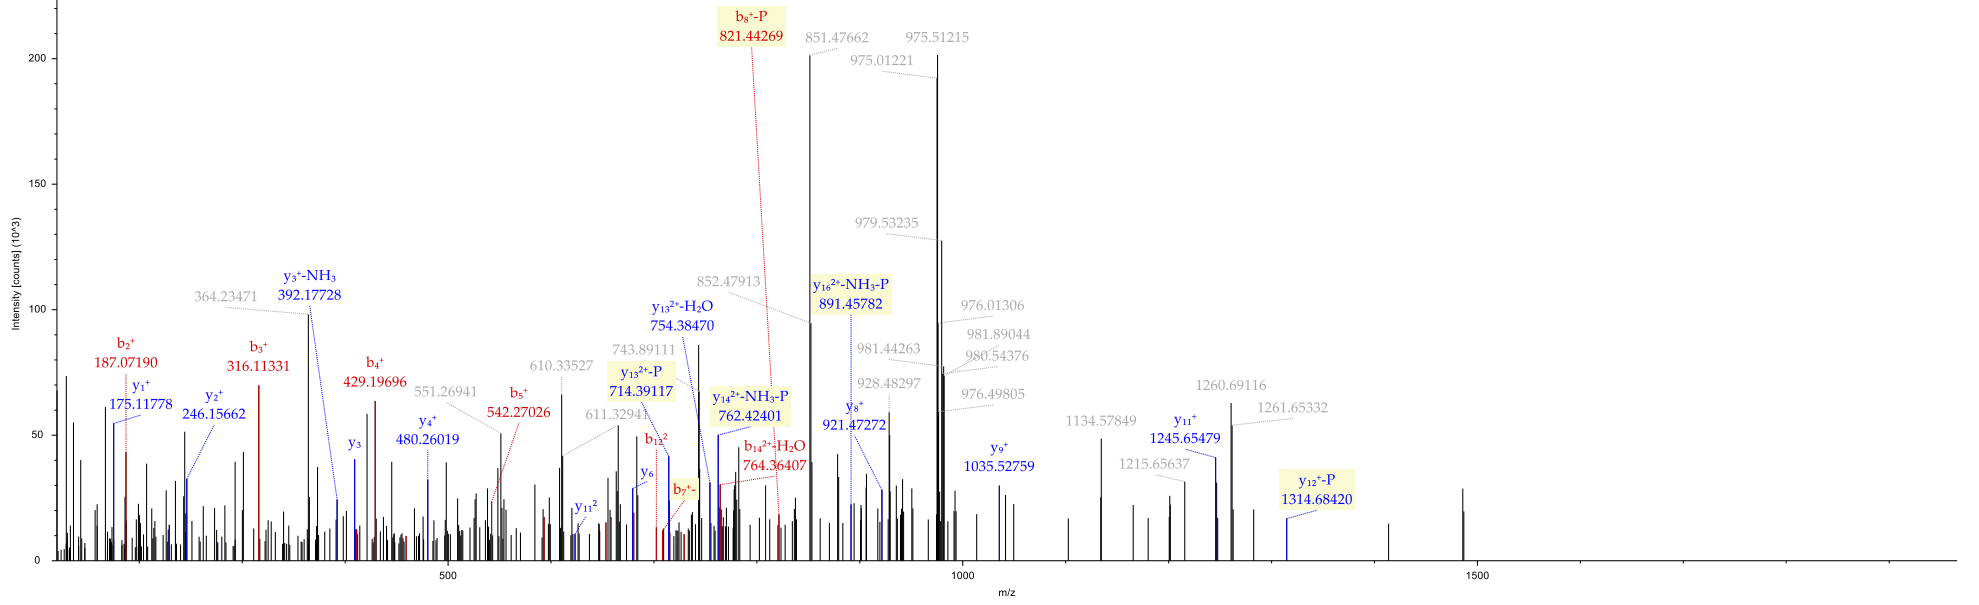

### 501-pSLDRGEFR-508

20180625\_Huan-Hong.raw #4041 RT: 12.3061 min  
 FTMS, 530.2347@hcd28.00, z=+2, Mono m/z=530.23474 Da, MH+=1059.46221 Da, Match Tol.=0.02 D

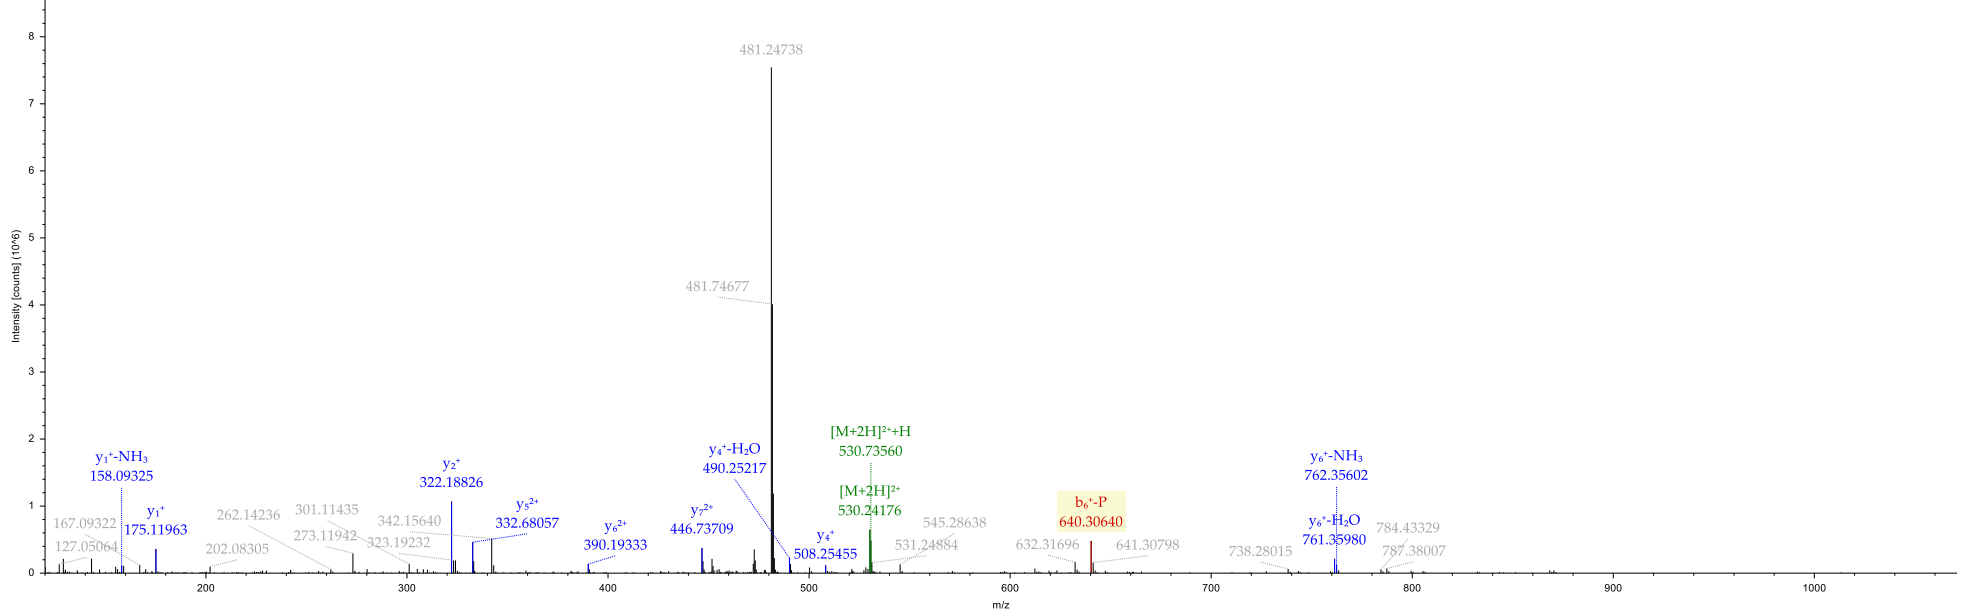



**Figure S1: Phosphorylation of Myo1c with CaMKII.** (A) Myo1c-3IQ WT treated with phosphatase and CaMKII was detected with SYPRO Ruby Protein Gel Stain (total-protein stain) and Pro-Q Diamond Phosphoprotein Gel Stain (phosphoprotein stain), respectively (left panel). Cartoon representation of Mass spectra analysis of Myo1c-3IQ (PDB ID: 4BYF) phosphorylated with CaMKII (right panel). The amino acids (S73, S104, S332 and S501) phosphorylated by CaMKII were colored blue. The amino acids (S572 and S373), which have been phosphorylated when expressed in SF9 cells, were colored magenta. S701 was colored red. (B) Detailed information of MS/MS analysis of phosphorylated residues (S73, S104, S332 and S501) and unphosphorylated residue S701 of Myo1c-3IQ treated by CaMKII. All fragment ions were generated with high resolution (35,000) and matched within 10 ppm accuracy.

**A**

|                            |        |   |   |   |   |   |   |   |   |   |   |   |        |
|----------------------------|--------|---|---|---|---|---|---|---|---|---|---|---|--------|
| $\alpha 2$ helix of ChREBP | 121    | R | L | N | N | A | I | W | R | A | W | Y | 131    |
| IQ1 (698-720)              | RRQSLA | T | K | I | Q | A | A | W | R | G | F | H | WRQKFL |
| IQ2 (721-743)              | RVKRSA | I | C | I | Q | S | W | W | R | G | T | L | GRRKAA |
| IQ3 (744-766)              | KRKWAA | Q | T | I | R | R | L | I | R | G | F | I | LRHSPR |

**B**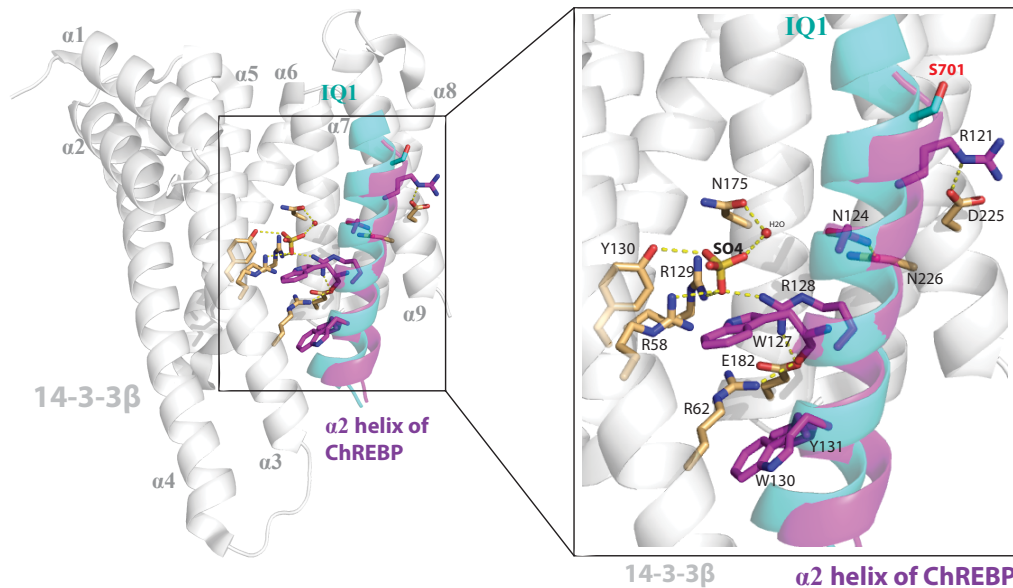

**Figure S2: Comparison of sequence and structure of Myo1c IQ motifs and  $\alpha 2$  helix of ChREBP.**

(A) Alignment of amino acid sequence of  $\alpha 2$  helix of ChREBP and IQ motifs of Myo1c. The residues of  $\alpha 2$  helix of ChREBP in gray are those in contact with 14-3-3 $\beta$ . (B) Overview of 14-3-3 $\beta$  binding  $\alpha 2$  helix of ChREBP (PDB ID: 4GNT) and aligned IQ1 motif of Myo1c (aa. 698-720, PDB ID: 4BYF). 14-3-3 $\beta$ ,  $\alpha 2$  helix of ChREBP and IQ1 motif were labeled in gray, magenta and cyan, respectively. Nine helices were labeled as  $\alpha 1$ -9 (left). The enlarged box showed detailed view of the interaction of 14-3-3 $\beta$  with  $\alpha 2$  helix of ChREBP and aligned IQ1 motif of Myo1c. A free sulfate (SO4) mediates the interaction between R58, R129 and Y130 triad of 14-3-3 $\beta$  and R128 of  $\alpha 2$  helix of ChREBP. Hydrogen bond contacts exist between N124 of  $\alpha 2$  helix of ChREBP and N226 of 14-3-3 $\beta$ , and between W127 of  $\alpha 2$  helix of ChREBP and R58 of 14-3-3 $\beta$ , and between R128 of  $\alpha 2$  helix of ChREBP and E182 of 14-3-3 $\beta$ . Van der Waal contacts mainly exist between W127, W130 of  $\alpha 2$  helix of ChREBP and R62 of 14-3-3 $\beta$ , and between Y131 of  $\alpha 2$  helix of ChREBP and E182 of 14-3-3 $\beta$ . Residue S701 on IQ1 motif of Myo1c was labeled Red.
